# Supplementary material
Source: publisher figshare collection journal article supplement (https://gsajournals.figshare.com/ndownloader/files/26786003)
Supplement: Supplementary file 1 [file 26786003]

A

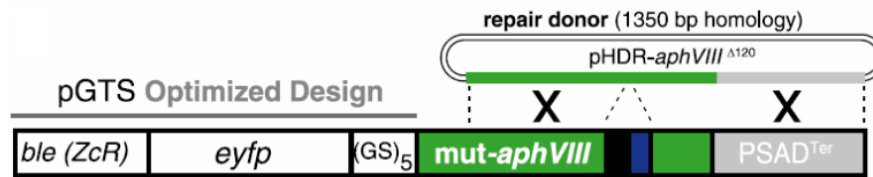

B

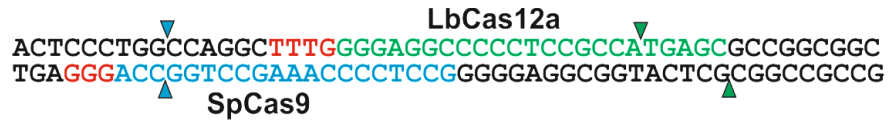

**Figure S3** Schematic representation of the *mut-aphVIII* repair assay in the CC3403-D5 strain. (A) Figure 2A from the paper of Griener *et al.* (2017) presents schematic drawing of a transgenic construct containing the defective *mut-aphVIII* gene inactivated by the inserted 51 bp fragment. The position of the 51 bp fragment containing the CRISPR/Cas cleavage sites is shown in black/blue square. The *mut-aphVIII* gene can be repaired through homologous recombination with *pHDR-aphVIII<sup>Δ120</sup>* plasmid containing the long homology region with the target. (B) The 51 bp fragment comprises protospacers for two gRNAs, *EMX1 mut-aphVIII SpCas9* gRNA (shown in blue) and *mut-aphVIII LbCas12a* gRNA (shown in green). PAMs are shown in red and cleavage sites are marked using triangles.
